# Supplementary material
Source: PubMed Central journal article supplement (PMC4580343)
Supplement: NIHMS714489-supplement-216_2015_8918_MOESM1_ESM.pdf [file NIHMS714489-supplement-216_2015_8918_MOESM1_ESM.pdf]

**Analytical and Bioanalytical Chemistry**

**Electronic Supplementary Material**

**An immunoassay for the detection of triclosan-*O*-glucuronide, a primary human urinary metabolite of triclosan**

Anupama Ranganathan, Shirley J. Gee, Bruce D. Hammock

(a)

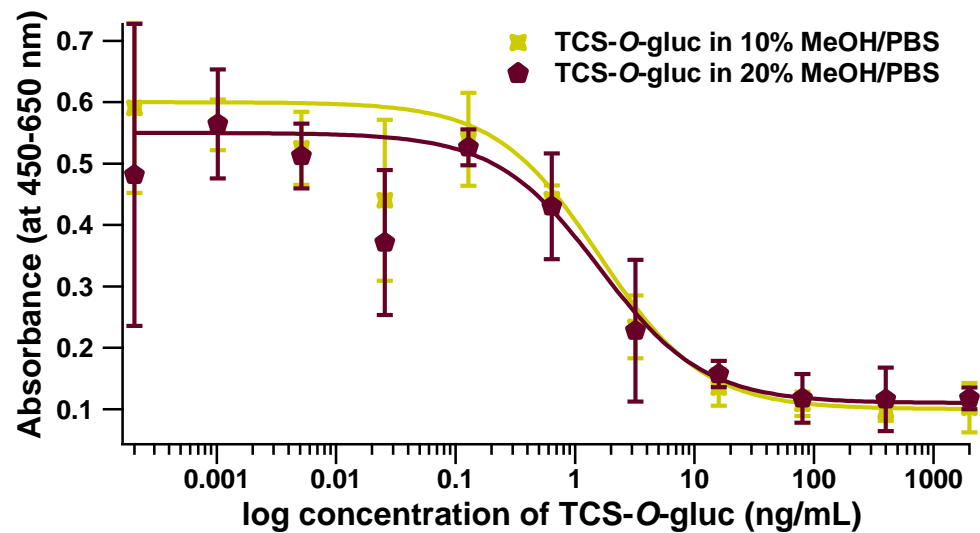

(b)

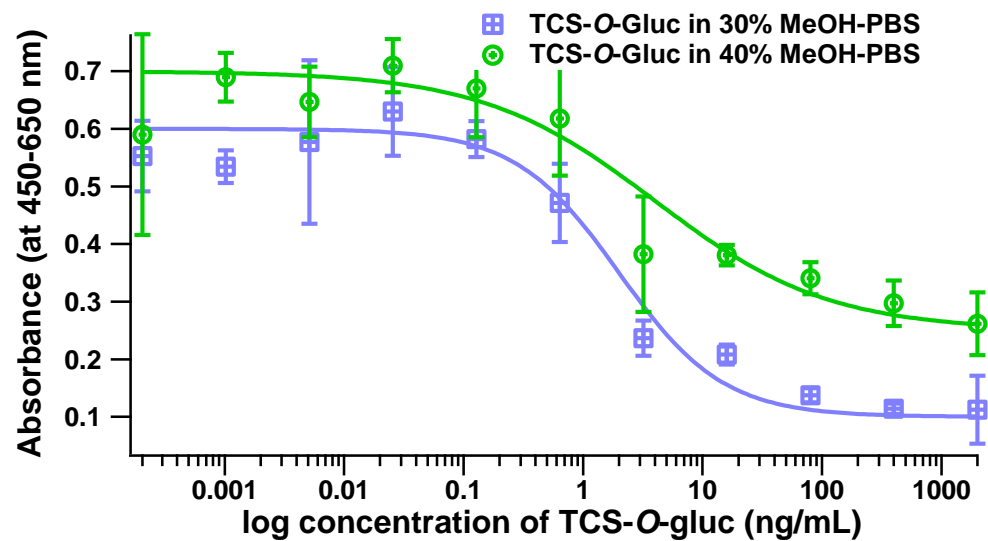

Supp Info Fig. S1: Effect of different percentages of methanol in PBS on assay performance. Standard curves in (a) 10% and 20% MeOH-PBS, (b) in 30% and 40% MeOH-PBS.

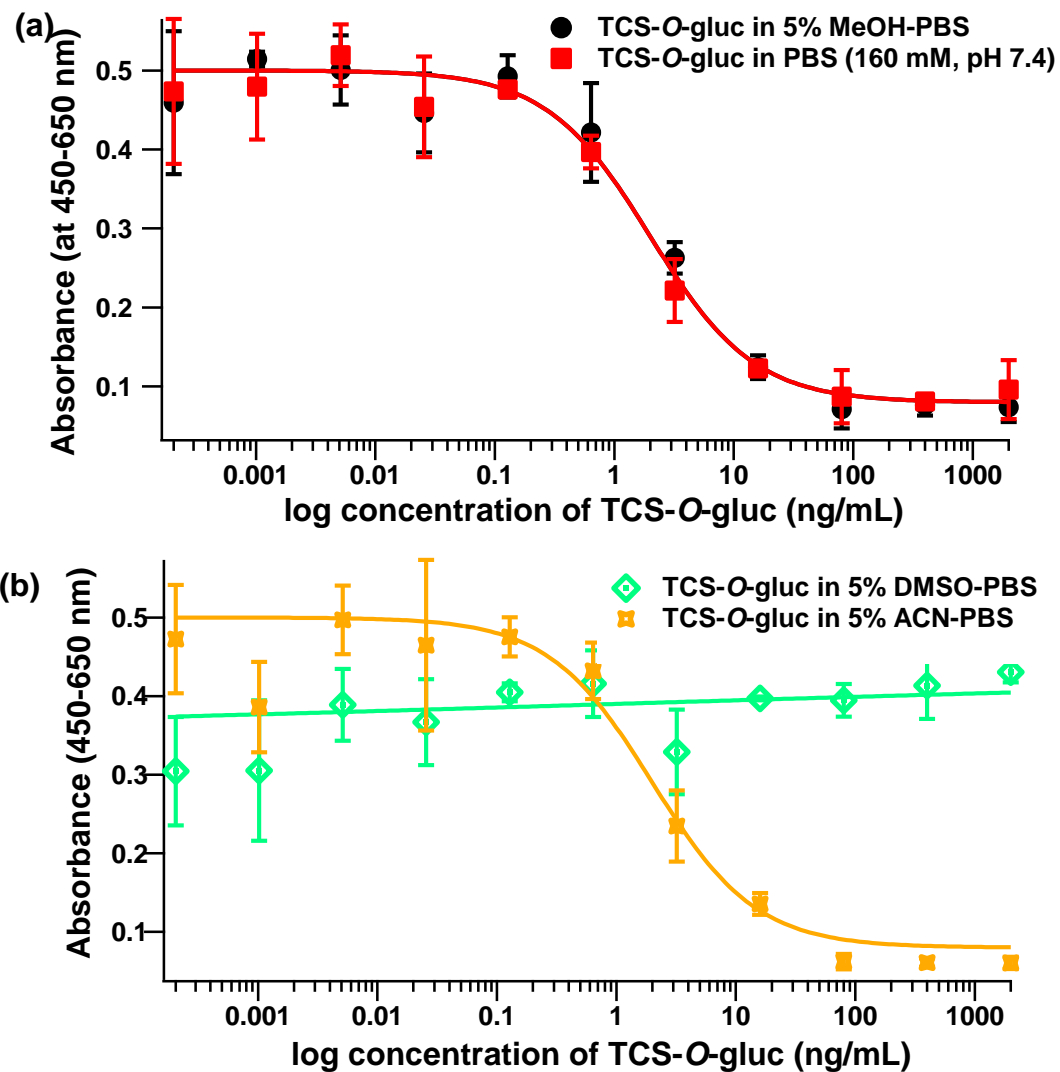

Supp Info Fig. S2: Effect of different solvents on assay performance. Standard curves in (a) 5% MeOH-PBS and PBS alone. (b) 5% DMSO-PBS and 5% ACN (acetonitrile)-PBS.

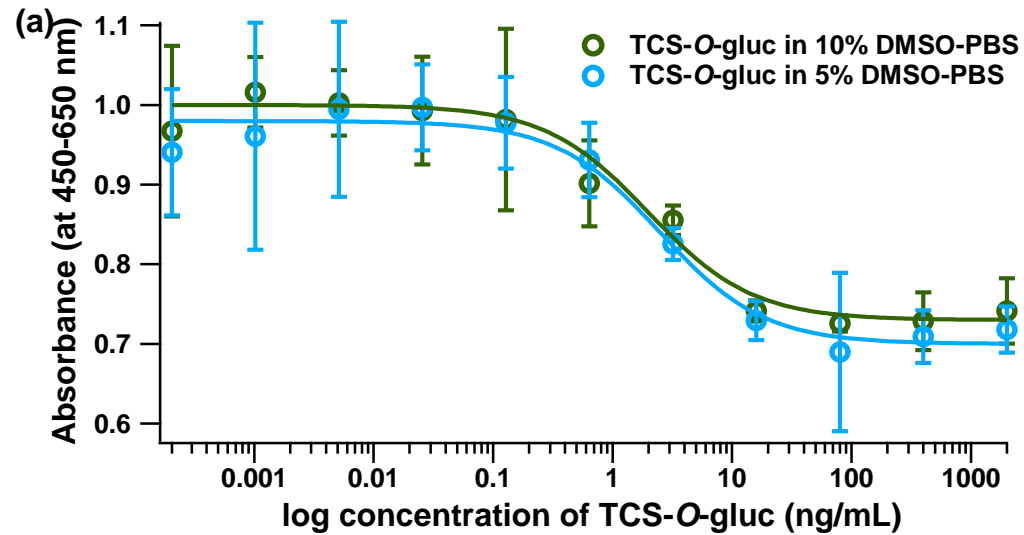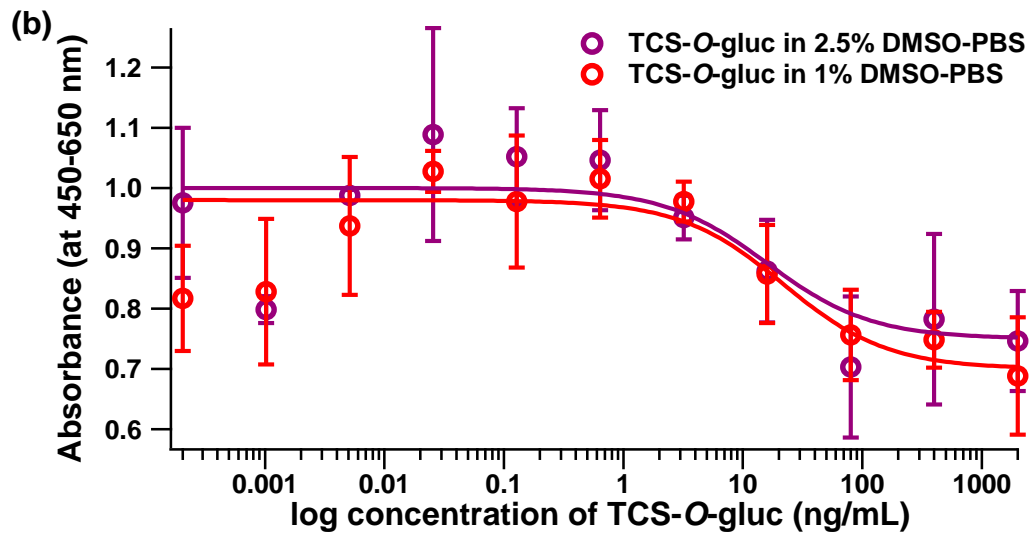

Supp Info Fig. S3: Different percentages of DMSO-PBS mixtures tested in the ELISA – (a) 10%, 5%, (b) 2.5%, 1%.

### Rabbit Ab 2619

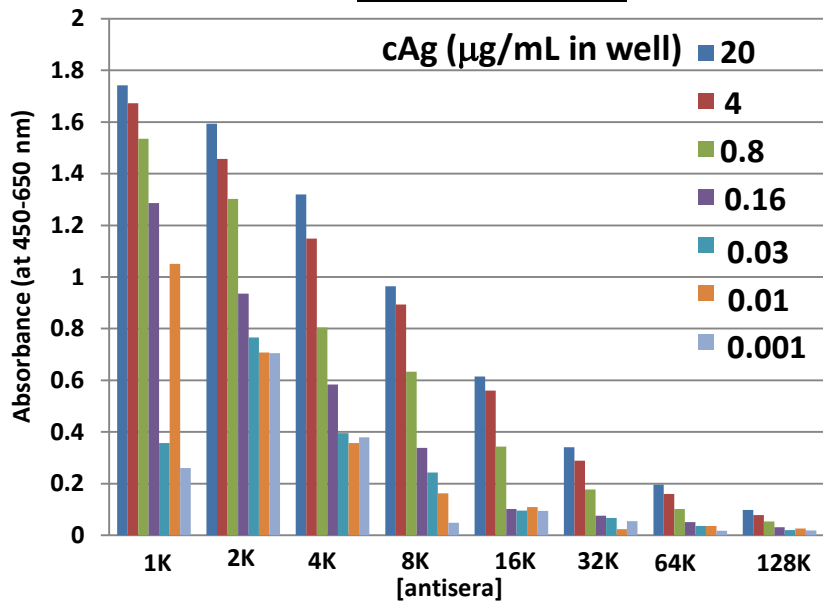

### Rabbit Ab 2621

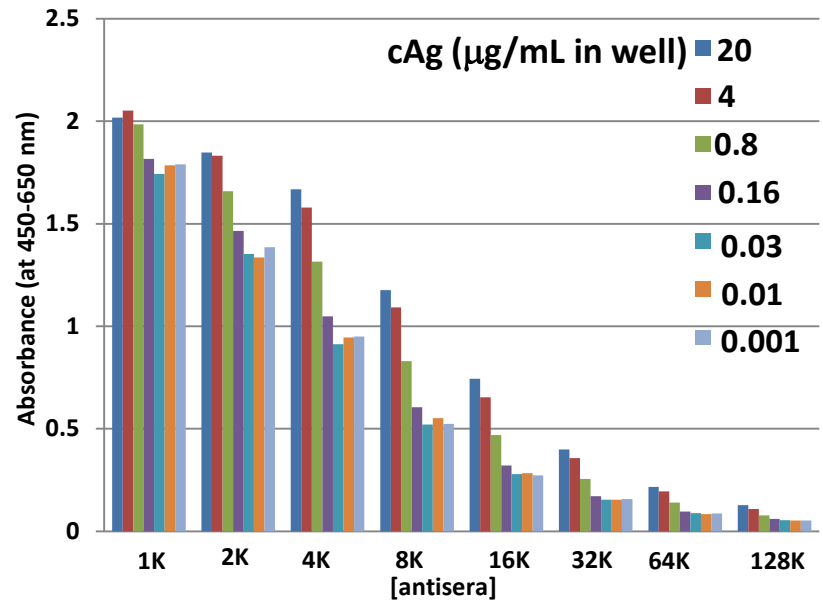

### Rabbit Ab 2623

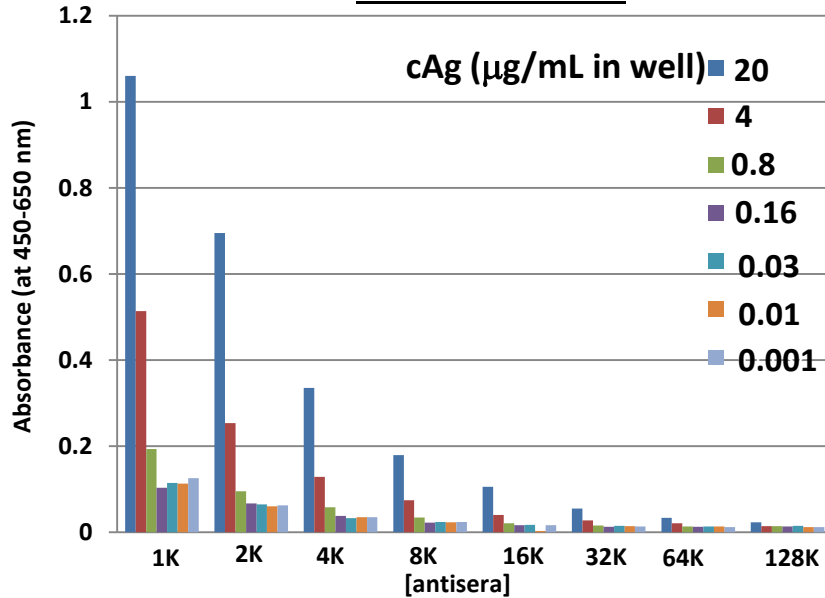

Supp Info Fig. S4: Binding of antisera from rabbits 2619, 2621 and 2623 to the homologous coating antigen TCS-O-gluc-BSA

### Rabbit Ab 2619

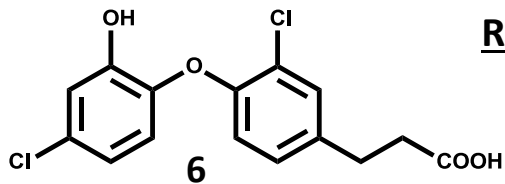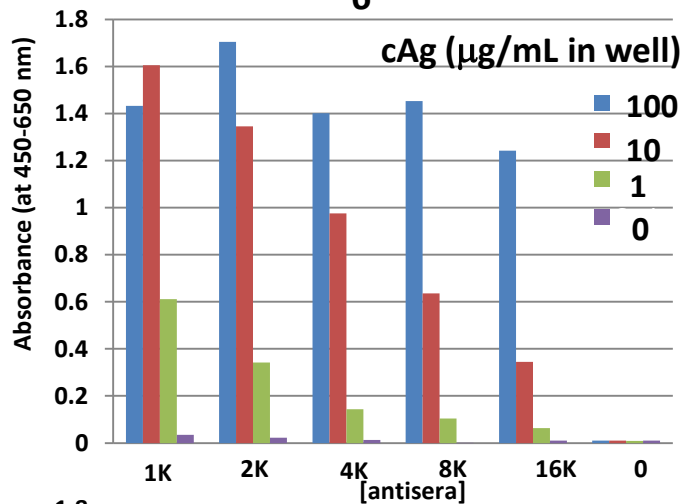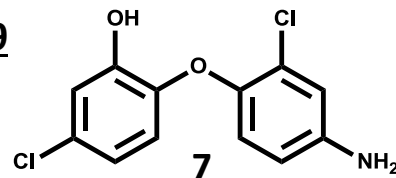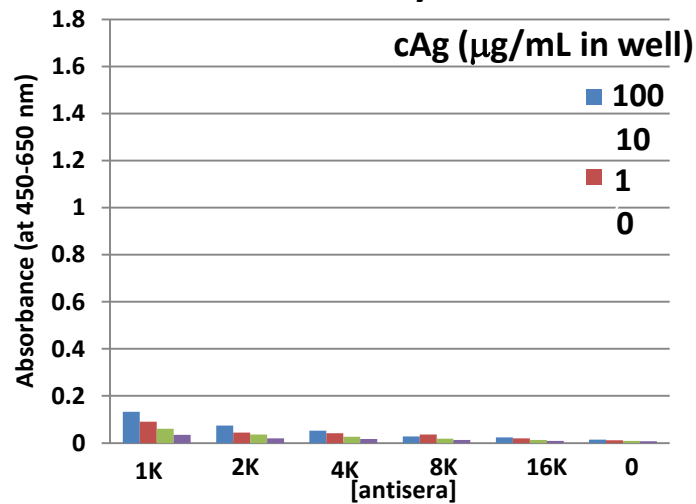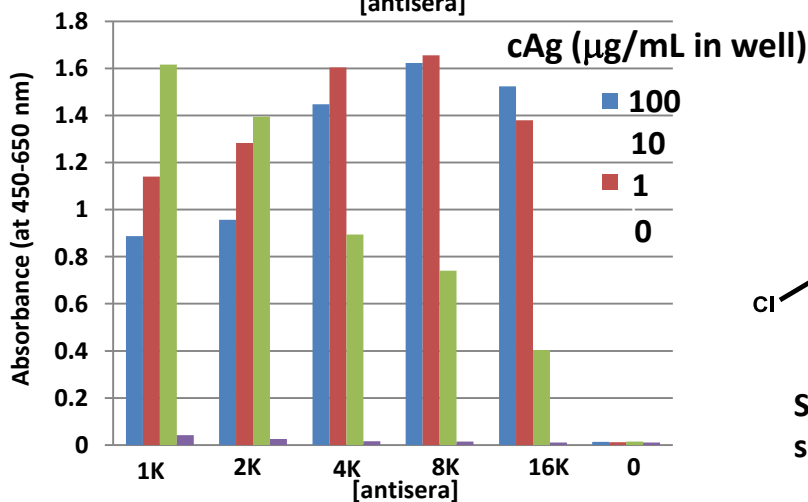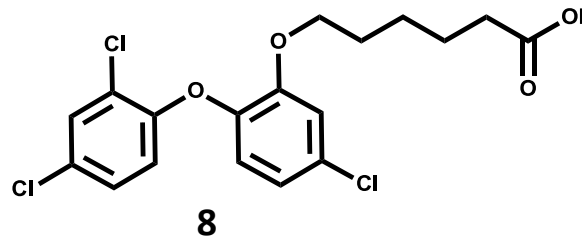

Sera: anti-TCS-Gluc-AEDP-Thy (Rabbit 2619)  
secondary Ab – goat anti-rabbit IgG HRP – 1:10000

Supp Info Fig. S5: Binding of rabbit antisera 2619 to heterologous coating antigens 6, 7 and 8

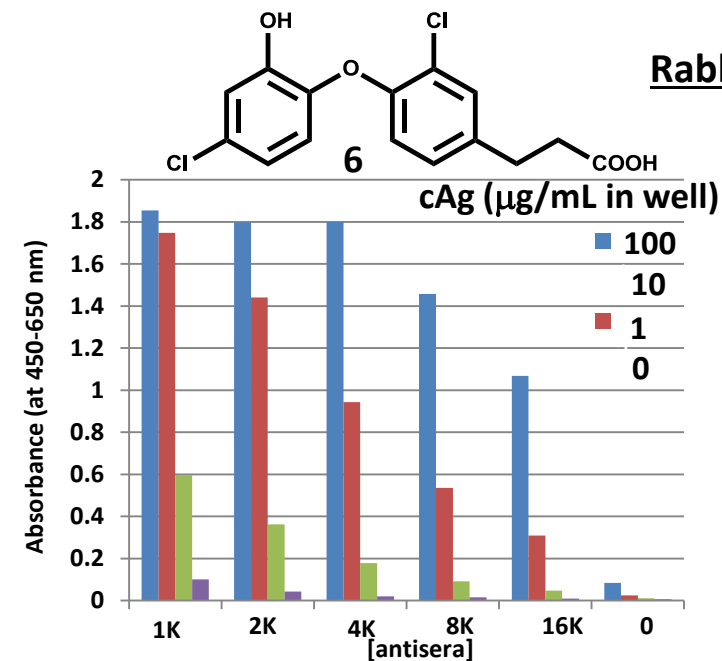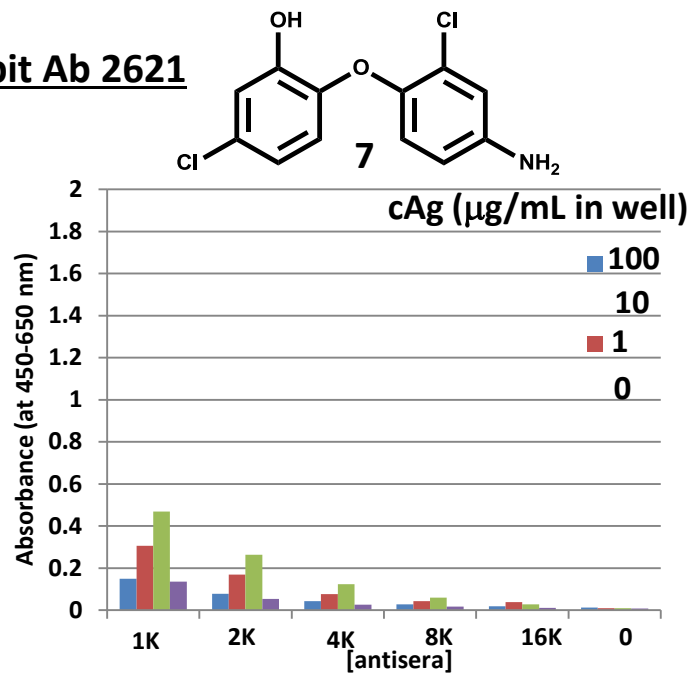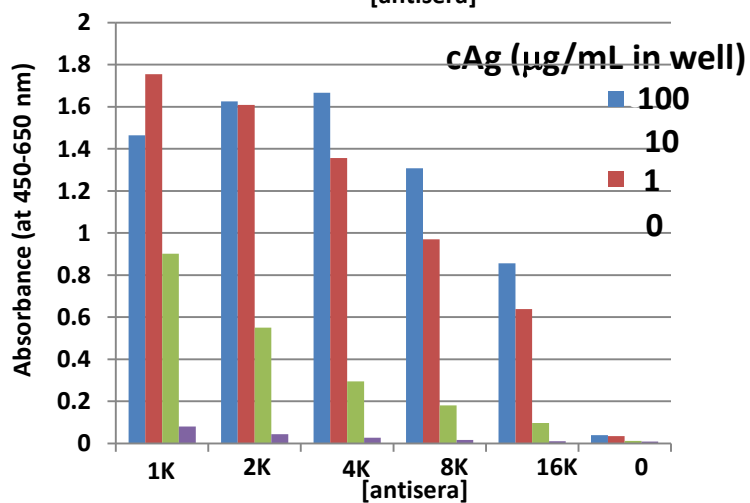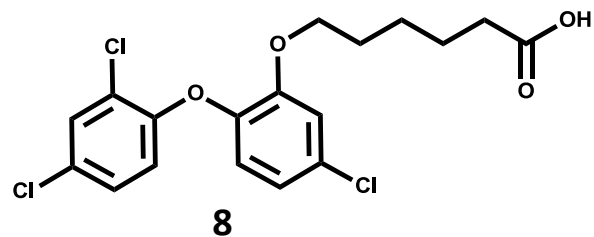

Sera: anti-TCS-Gluc-AEDP-Thy (Rabbit 2621)  
 secondary Ab – goat anti-rabbit IgG HRP – 1:10000

Supp Info Fig. S6: Binding of rabbit antisera 2621 to heterologous coating antigens 6, 7 and 8

### Rabbit Ab 2623

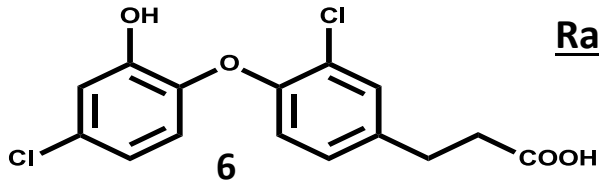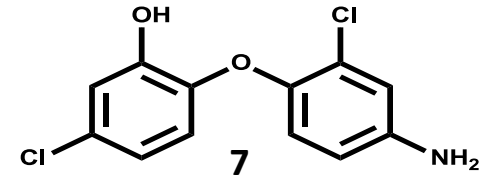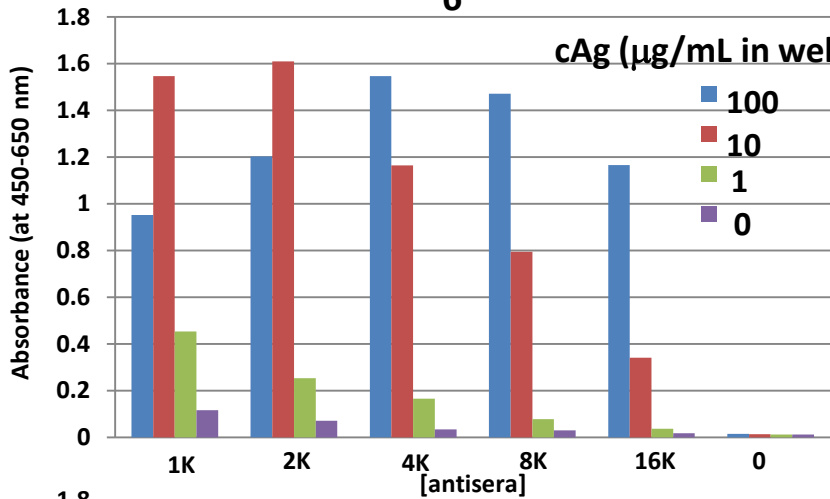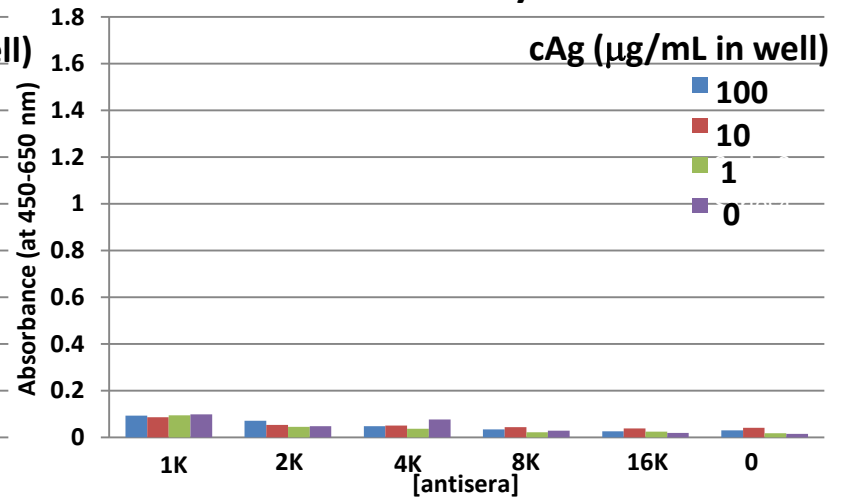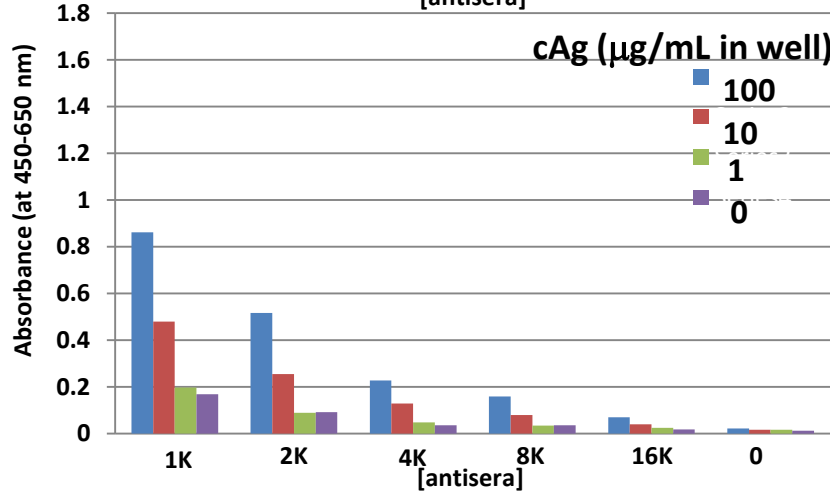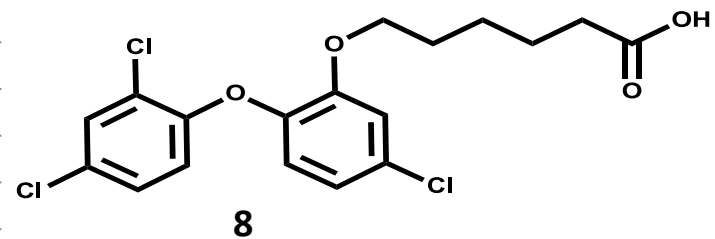

Sera: anti-TCS-Gluc-AEDP-Thy (Rabbit 2623)  
secondary Ab – goat anti-rabbit IgG HRP – 1:5000

Supp Info Fig. S7: Binding of rabbit antisera 2623 to heterologous coating antigens 6, 7 and 8



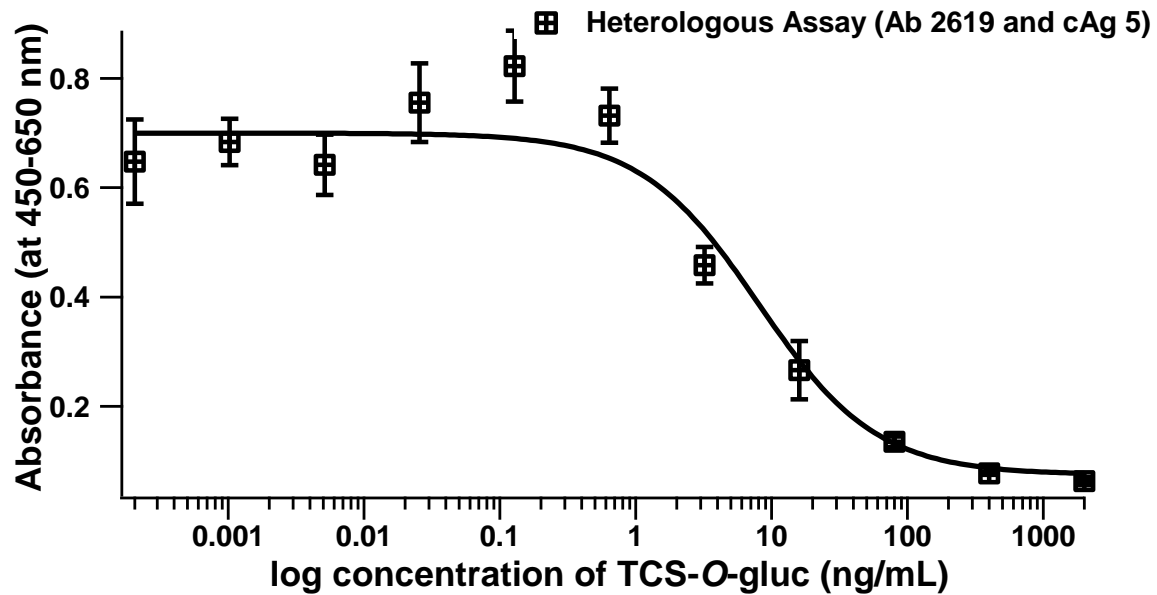

Supp Info Fig. S8. Rabbit Ab 2619, 1/10,000 final dilution in wells cAg 5: 1  $\mu\text{g}/\text{mL}$ ,  $A_{\text{max}}$  1.98 ([TCS-O-gluc = 0 ppb]),  $D_{\text{min}}$  0.08,  $IC_{50}$  6.06, slope 1.15
